# Supplementary material for: Combinatorial Signal Integration by APETALA2/Ethylene Response Factor (ERF)-Transcription Factors and the Involvement of AP2-2 in Starvation Response
Source: Int J Mol Sci. 2012 May 16;13(5):5933–51. doi: 10.3390/ijms13055933 (PMC3382747; doi:10.3390/ijms13055933)
Supplement: Supplementary file 1 [file ijms-13-05933-s001.pdf]

## Supplementary Information

**Figure S.1.** Effective photosynthetic quantum yield of leaf discs.  $\Phi$ PSII in H-light decreased to about half within 1 h. No significant effect was observed in low light (A). Sucrose had no effect, while ABA slightly decreased  $\Phi$ PSII (B). Application of 10  $\mu$ M DCMU strongly decreased  $\Phi$ PSII within 1 h. Methylviologen led to a slow but progressive decrease in  $\Phi$ PSII (C).  $n = 3$  with 6 leaf discs each,  $\pm$ SE.

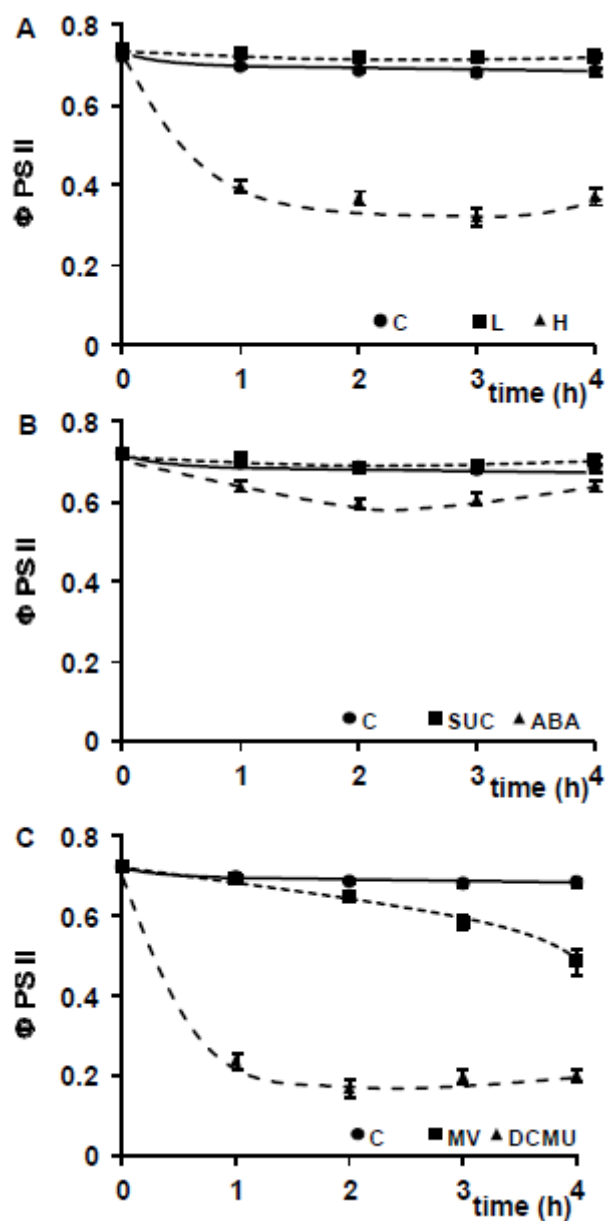

**Figure S.2.** Characterization of the *ap2-2* (At1g79700) KO-mutant. (A). The T-DNA insertion is located in the second exon of *ap2-2*. (B) The presence of the T-DNA insertion and homozygosity were confirmed by PCR with combinations of gene-specific and T-DNA insertion-specific primers (Table S.1) that generated a 1 kbp band in wild type or a 700 bp in *ap2-2* background. (C) Transcript analysis by RT-PCR gave the expected 220 bp product in the wild type and no products in *ap2-2*.

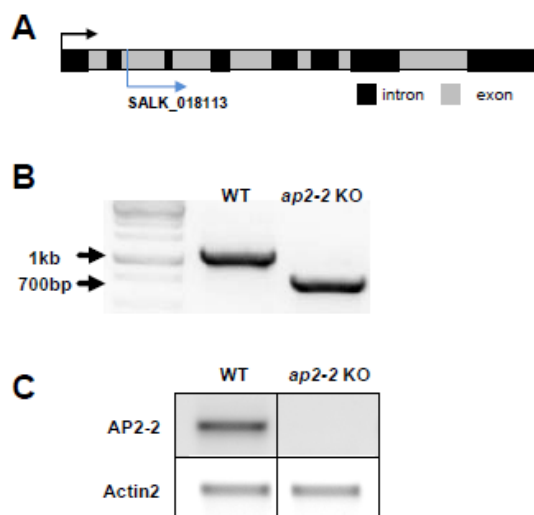

**Figure S.3.** Metabolite analysis of *ap2-2* and wild type measured in an extended darkness of 5 h. Metabolite profiles determined by GC-MS analysis were in three experiments. Significant differences were not observed.

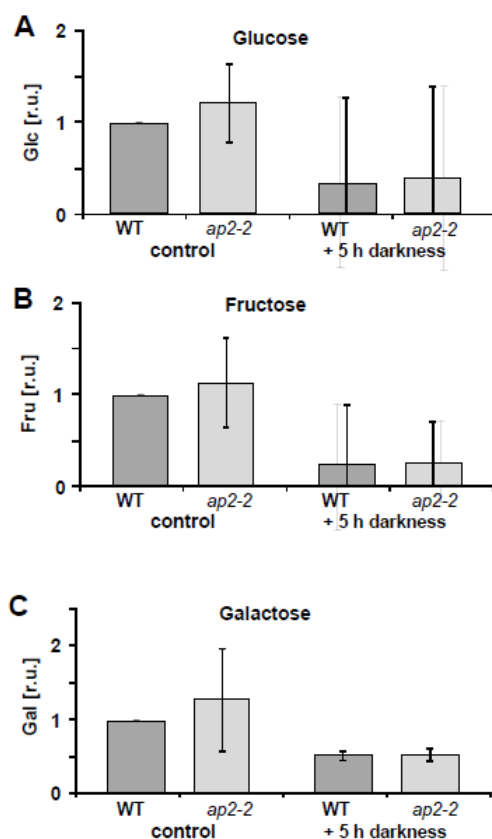

**Table S.1.** Primers for RT-PCR and SALK-T-DNA line of AP2-2.

| Target Gene     | ID Number   | Forward Sequence (5' – 3') | Reverse Sequence (5' – 3') | T <sub>A</sub> (°C) |
|-----------------|-------------|----------------------------|----------------------------|---------------------|
| ERF023          | Atlg01250   | CAGCTGAATTTCCCTGAAGA       | ACCCACCTCCACTCATCATA       | 52                  |
| RAV1            | Atlg13260   | GATTCAGAGAACGGCGTAGA       | CTTCGTCCATCTTCACGTCT       | 61                  |
| ADAP            | Atlg16060   | TGGGTTTTACGAGGTGTAT        | CGGCTGATGTCGAAGTTAGT       | 55                  |
| ERF017          | Atlg19210   | GACGTAACCTTGTCGCGATCT      | AACGATCACC GGAGTATTCA      | 58                  |
| ERF012          | Atlg21910   | AACCATTTTGCCCTACTTC        | GCATCGTCGTCGAGTTTAGT       | 61                  |
| RAP2.13         | Atlg22190   | TTCCCTGATCTCCGTCATAA       | ATCTCCTCCTCCGTATCACC       | 58                  |
| ERF019          | Atlg22810   | CGACGTTGCTTCTTCTGTT        | CCGCCCAGATAATCATACAC       | 61                  |
| TEM1            | Atlg25560   | CCGATGAGTTTGAGCAGAGT       | TAATCAAAACGCCTTTCGTC       | 63                  |
| ERF11           | Atlg28370   | GCCTACGACAAACGTGCTAT       | CACCTCTTCATCGAACACC        | 58                  |
| RAP2.6          | Atlg43160   | ATGGTGTCTATGCTGACTAATGTTG  | AGACTGAAGTTGTATTGGGACAGAA  | 61                  |
| ERF3            | Atlg50640   | CAGATTCAGAGGCGTAAGGA       | GGGAACTGTTGTTGATGGTC       | 58                  |
| ERF8            | Atlg53170   | GACCAATTTTCGGTGTTATCG      | CAGATCTAACGGCGGAGATA       | 58                  |
| RAP2.12         | Atlg53910   | ATTTTCGACGTCGGTGATGTT      | TTCTAGCACCTTCCCTTGGA       | 61                  |
| CRF10           | Atlg68550   | TAGGAAGAAGCCTGTTGGTG       | CAGGTGAAGAACGAGAGCAT       | 61                  |
| RAP2.8          | Atlg68840   | CGGCGATTTAGCTTTTCTTG       | CACGAGACGGTTTAGCTTCC       | 58                  |
| HRE1            | Atlg72360   | GAGCAGTCGGTACAAAGGAA       | TCAGCCTCATGATTCTCCTC       | 61                  |
| MSCP            | Atlg72820   | AGCTCTTTATCCTGCGGTTT       | CAGCAGCTTTAGCCTCTGTC       | 56                  |
| DREB2D          | Atlg75490   | CGAGATGTCATCATGTGGAA       | AGTGGGGAATGAAAGGAATC       | 58                  |
| ERF013          | Atlg77640   | GATCACCATCCATCTGCTTC       | CATCGTTGCCTCTGAGCTAT       | 61                  |
| RAP2.4          | Atlg78080   | GCGTTTCTCTCCCTCCTCT        | CTTTGGGCTGAGAAGATTTCG      | 56                  |
| AP2-2           | Atlg79700   | GTAAGGGGACGAGACACAC        | CCCTTCCAATTCTAGCTTCC       | 61                  |
| DEAR3           | At2g23340   | GGAGGAAGAGGTGGTGATTT       | CATCATCACCATCCGAATTT       | 58                  |
| ERF112          | At2g33710   | CTTCCCATGATCGCATTATC       | TGTTCTTCACGTTTTACCA        | 58                  |
| AP2-like        | At2g41710   | TGGAGAAGAATAACGGCAAG       | TCTCTTGTGGGAGGTAGCTG       | 62                  |
| ERF034          | At2g44940   | ACCAACGGTGGAGATAAACA       | CGGCTGAATGTCTTTAGGA        | 52                  |
| CRF5            | At2g46310   | GGAAAGCGAAGAAAAAGTCC       | CAACTGGGAATAACCAAAACG      | 52                  |
| RAP2.5          | At3g15210   | ACCCACAATAATGCCAAGGA       | GGACCTTCTGGTCACTCAGC       | 56                  |
| RAP2.3          | At3g16770   | GTGAAGAAGGAGCAGGCAAC       | TATCACCACGGATCTGCTTG       | 61                  |
| Actin2          | At3g18780   | TTGGTAGGCCAAGACATCAT       | GGAGCCTCGGTAAGAAGAAC       | 58                  |
| ARF14           | At3g25730   | TAAAAACGGCGAGTTACTG        | CTCCAACCTTTGGTCAACAC       | 61                  |
| CRF11           | At3g25890   | CAGATTCCTGAAATGGGTTG       | GTGGTTCCAATGAGAACCAAG      | 58                  |
| ASN1            | At3g47340   | TTGCTCGACACACGAGATAA       | CTCATAAGGCGTTGAAGGAA       | 56                  |
| PKRP            | At3g49160   | TAAAAACCTGGTCCGTGTGT       | ACAAACCCGGTACTGTTGAA       | 58                  |
| CEJ1            | At3g50260   | ACAAGCGTTCAAGACTTTGG       | CCCCTATCGCATCTACTTGA       | 63                  |
| WR11            | At3g54320   | ATCAGAATCTCGCAATGAG        | ACCGAGGTTGTTGTTGTTGT       | 61                  |
| SMZ             | At3g54990   | AAAATGCACCCAATTCAAAA       | TGGACCGATTGATACCCTTA       | 52                  |
| ERF035          | At3g60490   | ATTATCCGGTTTGCTTCCTC       | TCTTCGTTGCTTTCCCTTGTC      | 61                  |
| AP2-like        | At4g13040   | TTCCAAATCCTAATGCCAGA       | TCGCTTCTTCTATGCTGCT        | 61                  |
| B-Amylase       | At4g15210   | TTCTGGGATTCAGTGTTGT        | GTTCTCACCCGCAACTTCTA       | 56                  |
| ERF6            | At4g17490   | TGAAACCAAAACCGGAAATAA      | TCTCCTCTGCTGCTACAACC       | 58                  |
| ERF1A           | At4g17500   | GGAGCTAGGGTTTGTTAGG        | ACCGTCAATCCCTTATCCAT       | 58                  |
| CRF2            | At4g23750   | CACCTACCAAAACCAGGATTC      | AACTTCTTCTCTCCCGTCGT       | 61                  |
| ERF054          | At4g28140   | TCGTTAGAGGCTTTCCTTT        | CTTCGTTGCGATGTAAGGTT       | 61                  |
| ERF015          | At4g31060   | GCCTATGATGTGCTTTGTT        | CAGAGGAAGCAGGAAC'TCA       | 58                  |
| RRTF1           | At4g34410   | GAAGGATGTCTCGGCTGTAA       | ACACGTGTGGCTCTTTTAGG       | 61                  |
| FLO2            | At4g36920   | CAGACCCAATAACCCACTTG       | ACTCTTTTCAACGGCTGTG        | 56                  |
| ERF060          | At4g39780   | CATGACCGCTCAGAACTCT        | CCGTAGTATCCATCCTCGTG       | 61                  |
| ERF106          | At5g07580   | TGACCCCATCTCTAAAACCA       | CCAATCAGAGCTTTCCTCA        | 61                  |
| AIL6            | At5g10510   | GGAGGAAGAGTAGCGGTTTC       | AAGACGTTTAGCTGCACCAC       | 58                  |
| TINY2           | At5g11590   | TATCGCGGAGTAAGGATGAG       | CTGAATGTCTCGAGGGCTTA       | 63                  |
| RAP2.6L         | At5g13330   | AAAGGCACCAAGGCTAAACT       | AAGAAGGCGTTGAAAAAGGT       | 58                  |
| LEP             | At5g13910   | TACAAGGTTTCTTGGGGTGA       | GATCATTGCTAGGAGGAGCA       | 61                  |
| DIN10           | At5g20250   | GGAGAGTTTATGCAGCCTGA       | TTAGCAAGCTGACACCATCA       | 61                  |
| AKINβ1          | At5g22170   | TACCAGCCGACAGAAATTAC       | GAGCGGTTTGTAGAGGACAA       | 58                  |
| ERF003          | At5g25190   | CGCTAAACTCCACAAATGCT       | CGCTAAACTCCACAAATGCT       | 63                  |
| ERF5            | At5g47230   | CCGATGAAGGTGAGAAGAAA       | CAACTGGGAATAACCAAAACG      | 61                  |
| BXL1            | At5g49360   | CAAGATACGCGAGGACACTT       | CGGGTCACTAGGTCTTGTGTG      | 58                  |
| RD29a           | At5g52310   | GTGGAGTAGAGGAGCAACGA       | CCGAACCATCCTTTAATCCT       | 58                  |
| ERF107          | At5g61590   | TGAGGAAAGCTCTGATTTGG       | ACCTCAGGTGACGTTGTTGT       | 61                  |
| ERF104          | At5g61600   | TACAGGGGAGTGAGACGAAG       | ACCCTTATCTCGCTTTCGTT       | 61                  |
| TOE3            | At5g67180   | TTAAGGACTACCCGATCAT        | TGATATCTCCGGCTCTTCTG       | 58                  |
| ERF010          | At5g67190   | CACGGCGGTTTCTATCTTA        | CCGTTTGTATAATTCCGATG       | 61                  |
| SALK TDNA       | Insertion   | ATTTTGCCGATTTCCGAAC        | -                          | 58                  |
| SALK TDNA AP2-2 | SALK_018113 | CGTGACAGTGACTAGACACG       | AATTGCATTGGATTGGACC        | 58                  |

**Table S.2.** Co-expression data for AP2-2. The data were obtained from *Expression Angler* [S-1] and *Arabidopsis Co-expression data mining tool* [S-2].

| ID        | r-Value Expression Angler | r-Value Arabidopsis Co-expression Tool | Annotation                                                   |
|-----------|---------------------------|----------------------------------------|--------------------------------------------------------------|
| At3g15450 | 0,773                     | 0,78543                                | Aluminium induced protein                                    |
| At5g21170 | 0,754                     | 0,795346                               | AKINBETA1                                                    |
| At5g22920 | 0,748                     | 0,760928                               | CHY-type Zinc finger protein                                 |
| At5g20250 | 0,692                     | 0,693651                               | DIN10                                                        |
| At3g15630 | 0,687                     | 0,68728                                | unknown protein                                              |
| At4g35770 | 0,682                     | 0,682269                               | ATSEN1                                                       |
| At2g17880 | 0,674                     | 0,643799                               | Chaperone DnaJ-domain                                        |
| At3g47340 | 0,672                     | 0,685696                               | ASN1                                                         |
| At1g56220 | 0,652                     | 0,658175                               | Dormancy/auxin associated family protein                     |
| At5g19120 | 0,649                     | 0,699898                               | Eukaryotic aspartyl protease family protein                  |
| At1g80920 | 0,648                     | 0,651041                               | Chaperone DnaJ-domain superfamily protein                    |
| At1g72820 | 0,646                     | 0,728021                               | Mitochondrial substrate carrier family protein               |
| At5g49360 | 0,645                     | 0,682814                               | ATBXL1                                                       |
| At5g28770 | 0,644                     | 0,666374                               | AtbZIP63                                                     |
| At1g03090 | 0,639                     | 0,656148                               | MCCA                                                         |
| At2g25900 | 0,62                      | 0,63037                                | ATCTH                                                        |
| At1g13700 | 0,615                     | 0,606129                               | PGL1__6-phosphogluconolactonase 1                            |
| At3g02540 | 0,613                     | 0,646452                               | Rad23 UV excision repair protein family                      |
| At3g26510 | 0,612                     | 0,610532                               | Octicosapeptide family protein                               |
| At2g31810 | 0,612                     | 0,620013                               | small subunit of acetolactate synthase protein               |
| At2g20670 | 0,611                     | 0,630448                               | unknown protein                                              |
| At3g23050 | 0,599                     | 0,588006                               | indole-3-acetic acid 7                                       |
| At1g01620 | 0,596                     | 0,606231                               | plasma membrane intrinsic protein 1C                         |
| At1g21830 | 0,596                     | 0,653546                               | unknown protein                                              |
| At5g24490 | 0,595                     | 0,576504                               | 30S ribosomal protein, putative                              |
| At3g60530 | 0,593                     | 0,577982                               | GATA transcription factor 4                                  |
| At1g25230 | 0,592                     | 0,597163                               | Calcineurin-like metallo-phosphoesterase superfamily protein |
| At1g22740 | 0,592                     | 0,603202                               | ATRABG3B                                                     |
| At1g68190 | 0,591                     | 0,598229                               | B-box zinc finger family protein                             |
| At2g05540 | 0,588                     | 0,607264                               | Glycine-rich protein family                                  |
| At3g15450 | 0,773                     | 0,78543                                | Aluminium induced protein                                    |

## References

- S-1. Toufighi, K.; Brady, S.M.; Austin, R.; Provart, N.J. The botany array resource: E-Northerns, expression angling and promotor analyses. *Plant J.* **2005**, *43*, 153–163.
- S-2. Manfield, I.W.; Jen, C.H.; Pinney, J.W.; Michalopoulos, I.; Bradford, J.R.; Gilmartin, P.M.; Westhead, D.R. Arabidopsis Co-expression tool (ACT): Web server tools for microarray based gene expression analysis. *Nucleic Acids Res.* **2006**, *34*, W504–W509.

© 2012 by the authors; licensee MDPI, Basel, Switzerland. This article is an open access article distributed under the terms and conditions of the Creative Commons Attribution license (<http://creativecommons.org/licenses/by/3.0/>).
